# Supplementary material
Source: PubMed Central journal article supplement (PMC9746232)
Supplement: tp-107-216-s001.pdf [file tp-107-216-s001.pdf]

**Table S1.** COVID-19 complete vaccination schedule effectiveness for all age groups in solid-organ transplant recipients in Colombia, by scheme. ESPERANZA cohort

| COVID-19 complete schedule effectiveness |               |         |                  |         |                  |         |
|------------------------------------------|---------------|---------|------------------|---------|------------------|---------|
| Vaccination                              | Infection     |         | Hospitalization  |         | Death            |         |
| schedule type                            | % (CI95%)     | p-value | %(CI95%)         | p-value | %(CI95%)         | p-value |
| Homologous                               | 72.5 (67.8-   | <0.001  | 83.1 (77.8-87.2) | <0.001  | 91.8 (88.3-94.3) | <0.001  |
| schedule                                 | 76.4)         |         |                  |         |                  |         |
|                                          | 73.4 (68.6-   | <0.001  | 85.4 (80.1-89.3) | <0.001  | 93.4 (89.8-95.7) | <0.001  |
| Pfizer                                   | 77.5)         |         |                  |         |                  |         |
|                                          | 74.2 (68.3-   | <0.001  | 83.3 (75.3-88.7) | <0.001  | 92.6 (87.5-95.6) | <0.001  |
| Sinovac                                  | 79.1)         |         |                  |         |                  |         |
|                                          | 73.7 (65.2-   | <0.001  | 88.4 (77.4-94.0) | <0.001  | 97.1 (87.9-99.3) | <0.001  |
| Janssen                                  | 80.1)         |         |                  |         |                  |         |
|                                          | 28.1 (0-48.9) | 0.059   | 85.2 (64.6-93.8) | <0.001  | 96.9 (76.5-99.6) | <0.001  |
| Moderna                                  |               |         |                  |         |                  |         |
|                                          | 67.9 (57.9-   | <0.001  | 82.5 (70.9-89.5) | <0.001  | 93.8 (86.4-97.1) | <0.001  |
| Astrazeneca                              | 75.5)         |         |                  |         |                  |         |
| Heterologous                             | 73.6 (0-93.5) | 0.064   | --               | --      | --               | --      |
| schedule                                 |               |         |                  |         |                  |         |

Estimates adjusted for age (y); sex, affiliation regime; municipality of residence; presence of comorbidities (CKD, cancer, DM, HBP and HIV infection); and prevalent variant at the time of infection. Unvaccinated individuals were the reference group in all models.-- Nonestimable effectiveness due to a low sample size ( $n < 200$ )

**Table S2.** COVID-19 vaccine booster effectiveness for all age groups in solid-organ transplant recipients in Colombia, by scheme. ESPERANZA cohort

| COVID-19 vaccine booster effectiveness |                  |         |                  |         |                  |         |
|----------------------------------------|------------------|---------|------------------|---------|------------------|---------|
| Vaccine booster type                   | Infection        |         | Hospitalization  |         | Death            |         |
|                                        | %<br>(CI95%)     | p-value | %<br>(CI95%)     | p-value | %<br>(CI95%)     | p-value |
| Homologous schedule                    | 69.8 (59.2-77.6) | < 0.001 | 81.0 (66.9-89.1) | < 0.001 | 91.7 (82.4-96.1) | < 0.001 |
| Pfizer                                 | 72.5 (59.5-81.4) | < 0.001 | 82.9 (63.5-92.1) | < 0.001 | 89.8 (73.7-96.1) | < 0.001 |
| Sinovac                                | 58.1 (35.9-72.7) | < 0.001 | 67.9 (35.1-84.2) | 0.001   | 91.9 (76.2-97.2) | < 0.001 |
| Janssen                                | 80.7 (0-97.3)    | 0.104   | --               | --      | --               | --      |
| Moderna                                | --               | --      | --               | --      | --               | --      |
| Astrazeneca                            | 76.2 (50.5-88.5) | < 0.001 | --               | --      | --               | --      |
| Heterologous schedule                  | 76.4 (68.1-82.5) | < 0.001 | 92.3 (83.7-96.4) | < 0.001 | 95.6 (88.6-98.3) | < 0.001 |
| Pfizer + Moderna                       | 75.1 (61.2-83.9) | < 0.001 | 91.6 (72.8-97.4) | < 0.001 | 97.3 (80.5-99.6) | < 0.001 |
| Sinovac + Pfizer                       | 70.2 (37.6-85.8) | 0.0013  | 90.8 (31.9-98.8) | 0.0194  | --               | --      |
| Pfizer + AstraZeneca                   | 80.1 (63.7-89.1) | < 0.001 | 95.3 (65.7-99.4) | 0.0025  | 93.4 (51.3-99.1) | 0.0076  |

Estimates adjusted for age (years); sex, affiliation regime; municipality of residence; presence of comorbidities (CKD, cancer, DM, HBP and HIV infection); and prevalent variant at the time of infection. Unvaccinated individuals were the reference group in all models.

-- Non-estimable effectiveness due to a low sample size ( $n < 200$ )
